# Supplementary material
Source: PubMed Central journal article supplement (PMC3199609)

## Supplemental Information

## Accession Numbers

The dbSNP submitted SNP (ss) numbers of *CHRNA4* reported in this paper are: 270137503, 270137504, 270137505, 270137506, 270137507, 270137508, 270137509, 270137510, 270137511, 270137512, 270137513, 270137514, 270137515, 270137516, 270137517, 270137518, 270137519, 270137520, 270137521, 270137522, 270137523, 270137524, 270137525, 270137526, 270137527, 270137528, 270137529, 270137530, 270137531, 270137532, 270137533, 270137534, 270137535, 270137536, 270137537, 270137538, 270137539, 270137540, 270137541, 270137542, 270137543, 270137544, 270137545.

**Table S1.** Primers and PCR conditions

| Exon |   | Primer sequence       | Amplicons size (bp) | Annealing temperature* | Number of cycles |
|------|---|-----------------------|---------------------|------------------------|------------------|
| 1    | F | TGAAGTTGGGCGCGCACGG   | 247                 | 72 °C→66 °C            | 13 + 20          |
|      | R | GCAGTCAGGAGCCTGCCTC   |                     |                        |                  |
| 2    | F | GGAGCTGAAAGGAAGTGGACG | 469                 | 72 °C→62 °C            | 11 + 22          |
|      | R | CTGGGACGCTCTGAATCAACC |                     |                        |                  |
| 3    | F | CCCGTCCACCATATCTTGC   | 184                 | 69 °C→56 °C            | 13 + 20          |
|      | R | GGCAGTGCCCTCCCACTC    |                     |                        |                  |
| 4    | F | CGCCCCACCTCATCCA      | 170                 | 69 °C→56 °C            | 13 + 20          |
|      | R | CACCAAGGCCCTGTAGAGGAC |                     |                        |                  |
| 5    | F | GGTCTCACACCCTTCGCTCTC | 331                 | 69 °C→55 °C            | 15 + 20          |
|      | R | CGGCACAGCACTCGTACTTC  |                     |                        |                  |
| 5    | F | CGGCTCCTGGACCTACGACAA | 532                 | 72 °C→60 °C            | 13 + 20          |
|      | R | GAGCAGGCGTGGCAGGATGT  |                     |                        |                  |
| 5    | F | TTCTACCTGCCCTCCGAGTGT | 760                 | 71 °C→64 °C            | 15 + 20          |
|      | R | CCGAGTGGGTGTTGCGAGAG  |                     |                        |                  |
| 5    | F | GCCCTGGCCTCTCGAACACC  | 647                 | 71 °C→64 °C            | 15 + 20          |
|      | R | GCAGGCACAGGCGCACTCT   |                     |                        |                  |
| 6    | F | GCTGGAGTGACGGCGTCTGT  | 169                 | 69 °C→58 °C            | 12 + 20          |
|      | R | GCTCCCGGTCCCTTCCTAGAT |                     |                        |                  |

\*Touchdown PCR

F, forward; PCR, polymerase chain reaction; R, reverse.

**Figure S1.** Sanger sequencing results of rare nonsynonymous variants found in the Exon 5 cytoplasmic region of *CHRNA4*.

**Controls (35 in total)**

1. 5-3 control 1 C15, 61981322

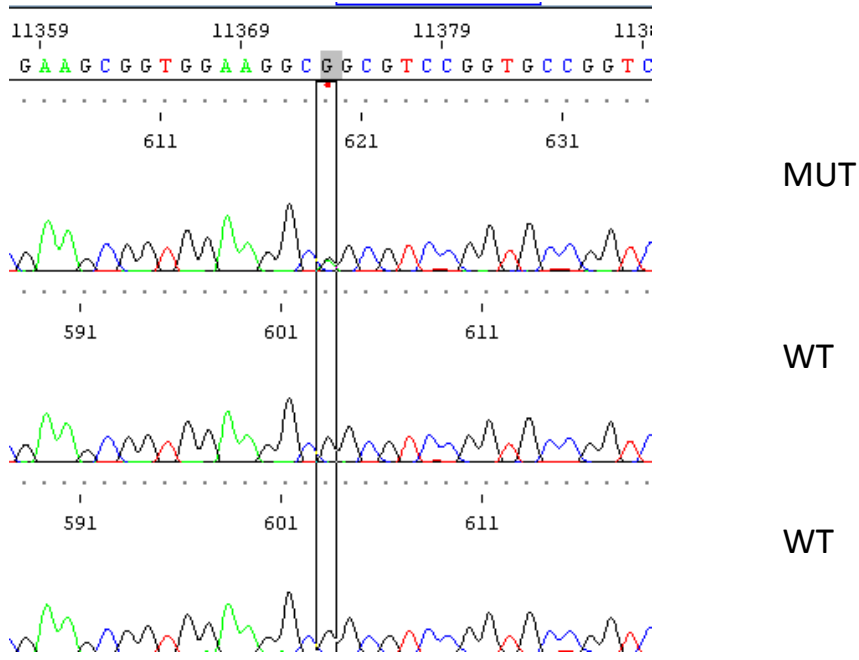

2. 5-3 control 1 C22, 61981603

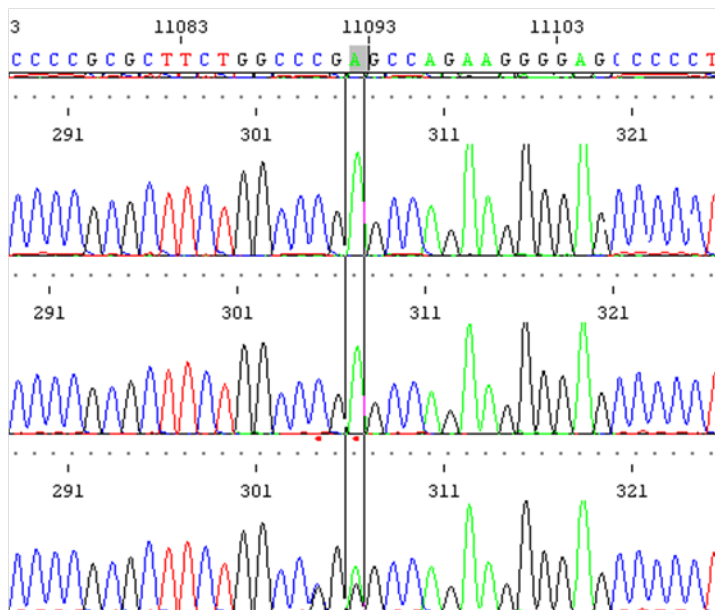

3. 5-3 control 1 C24, 61981603

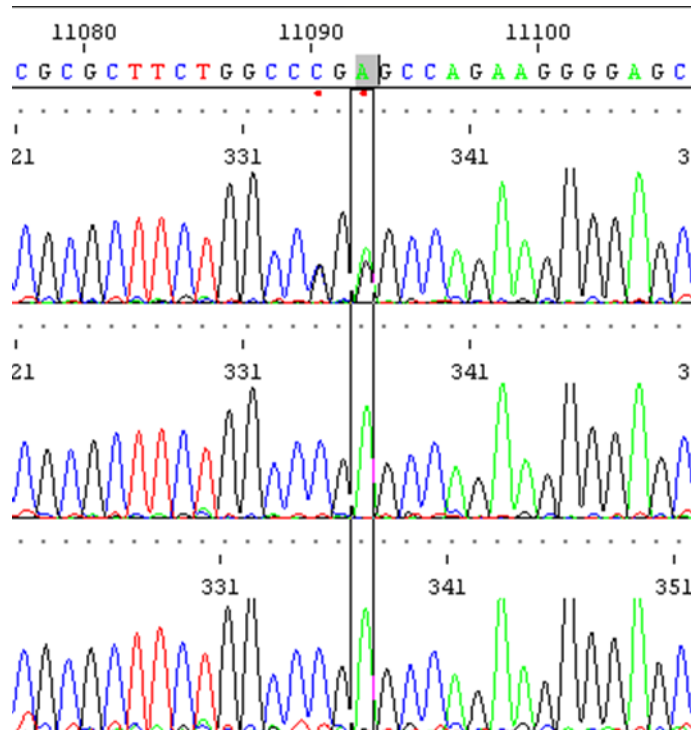

4. 5-3 control 1 H16, 61981697

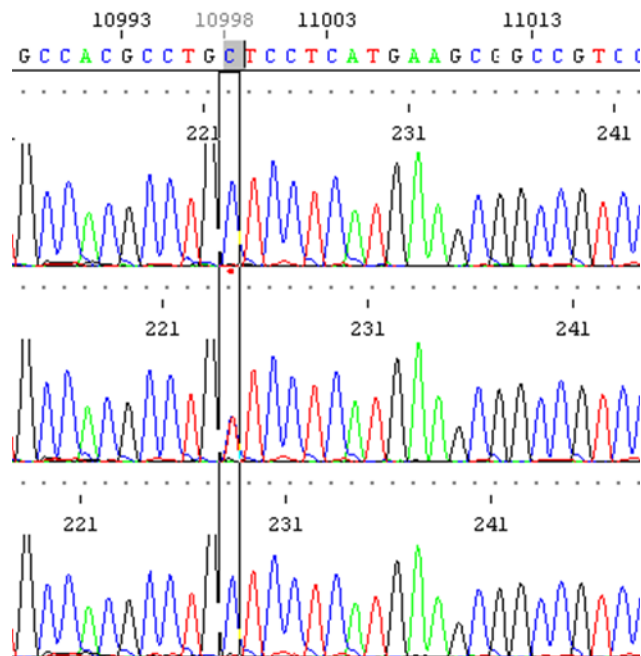

5. 5-3 control 1 J11, 61981303

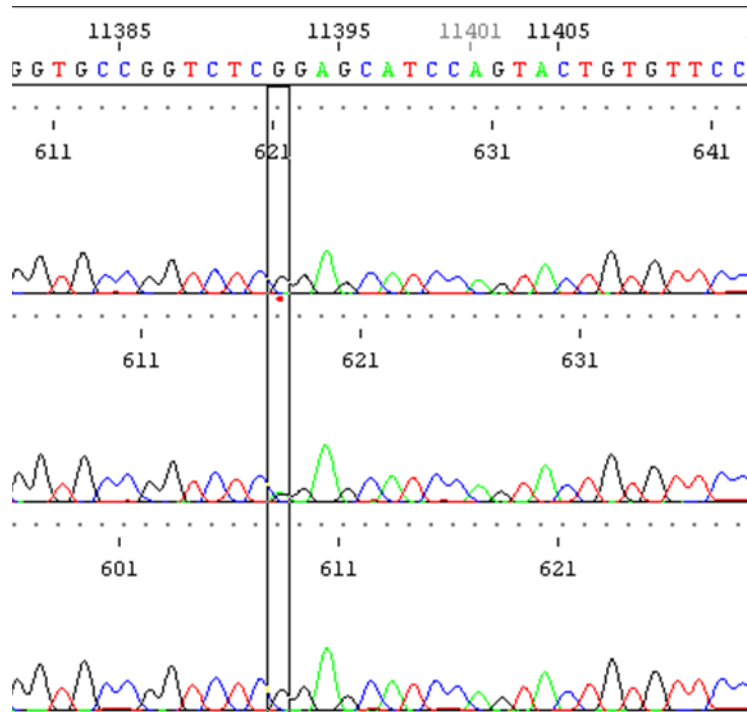

6. 5-3 control 1 K07, 61981322

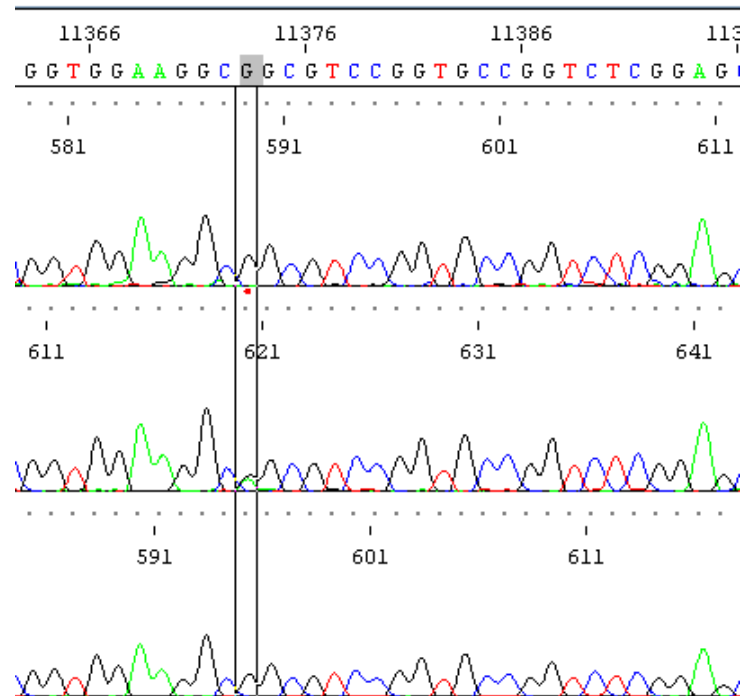

7. 5-3 control 1 L16, 61981390

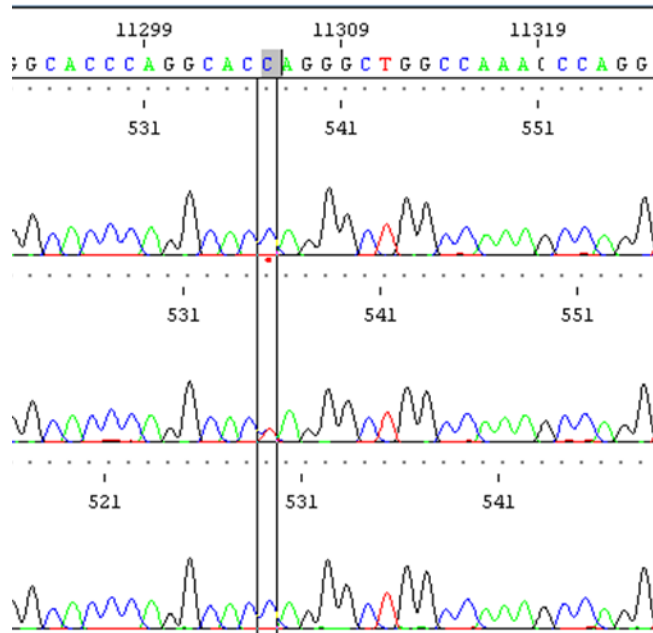

8. 5-3 control 1 L19, 61981676

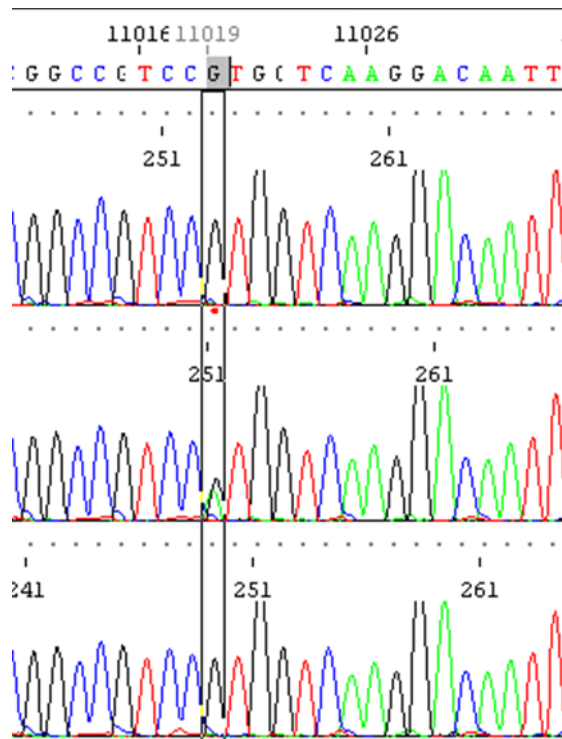

9. 5-3 control 1 N15, 61981594

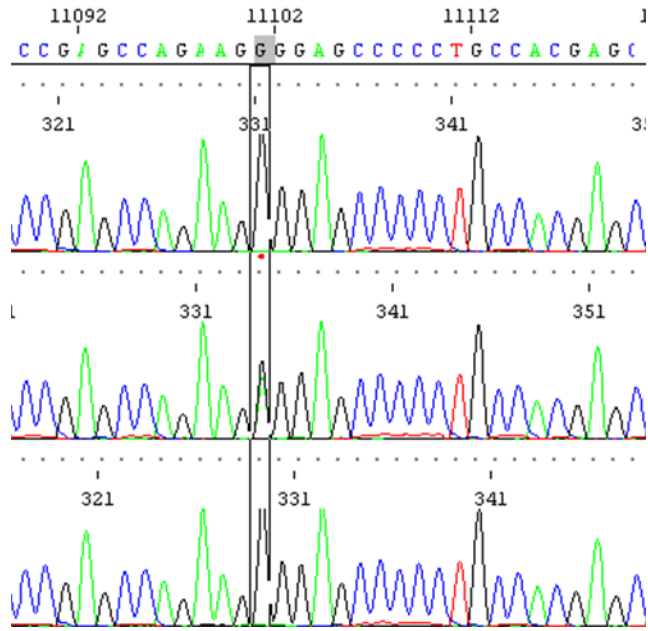

10. 5-3 control 1 P11, 61981498

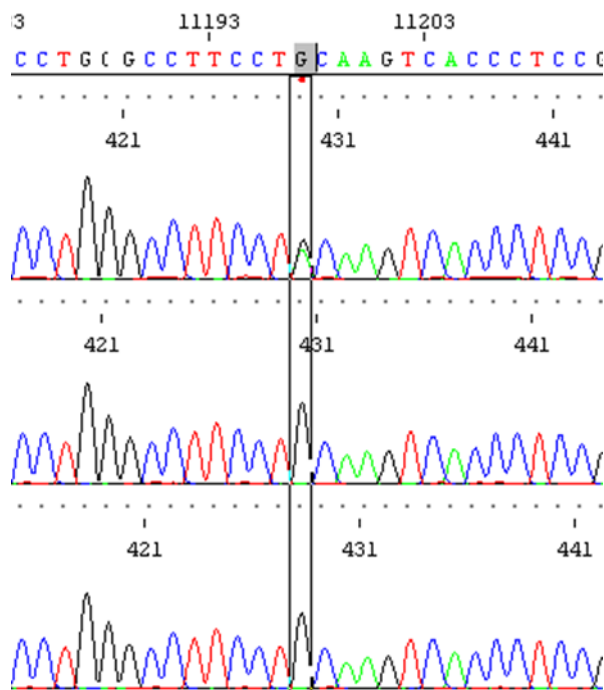

11. 5-3 control 1 P11, 61981603

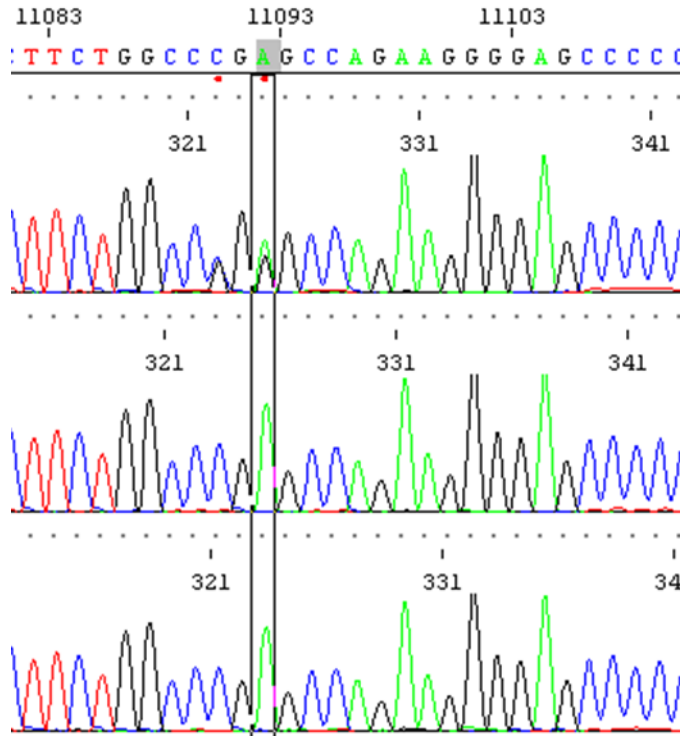

12. 5-3 control 2 D10, 61981411

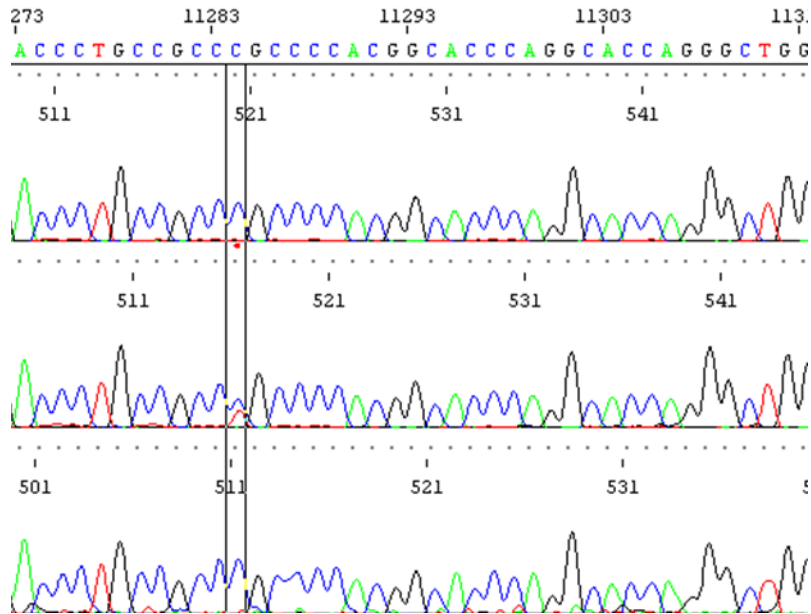

13. 5-3 control 2 D21, 61981361

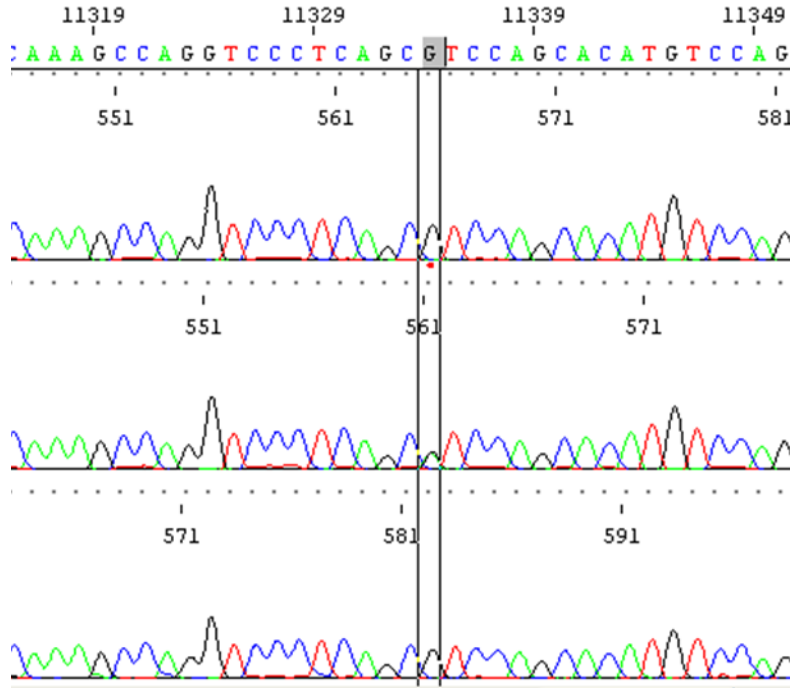

14. 5-3 control 2 B10, 61981411

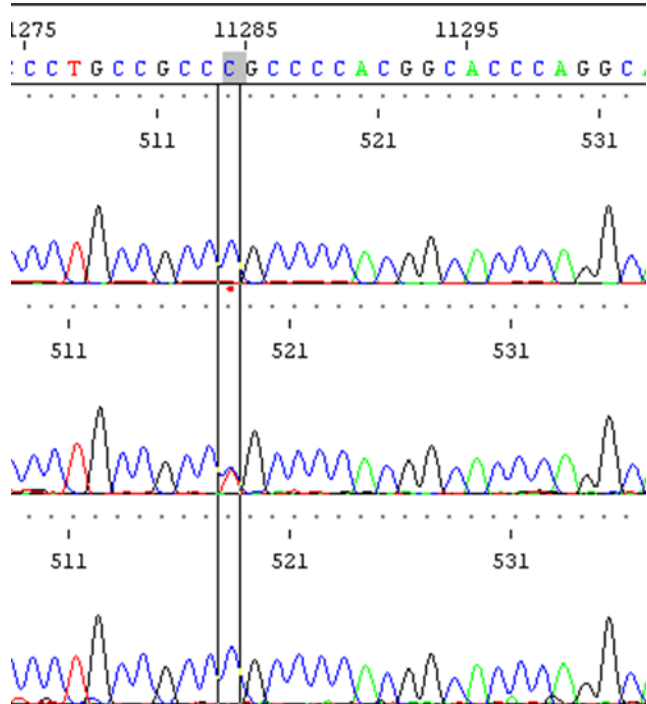



15. 5-3 control 2 C03, 61981390

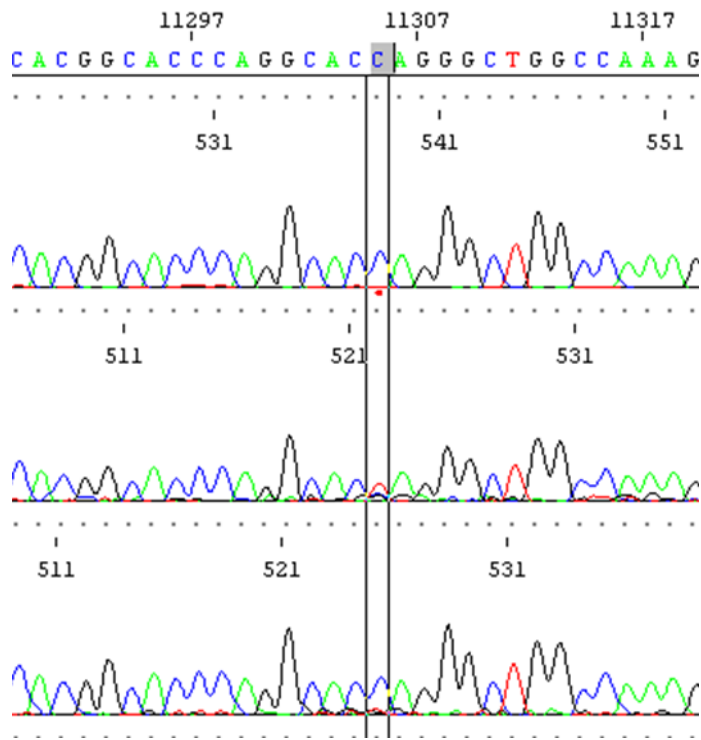

16. 5-3 control 2 E19, 61981390

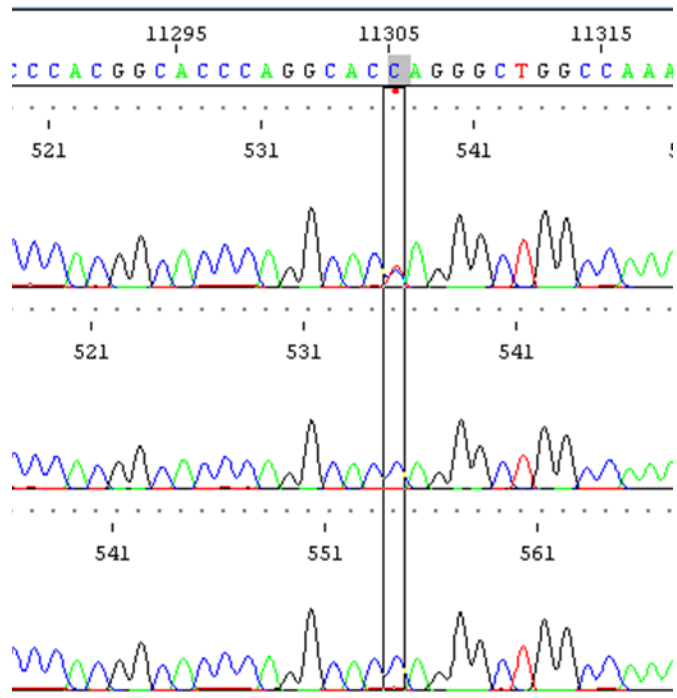

17. 5-3 control 2 G09, 61981303

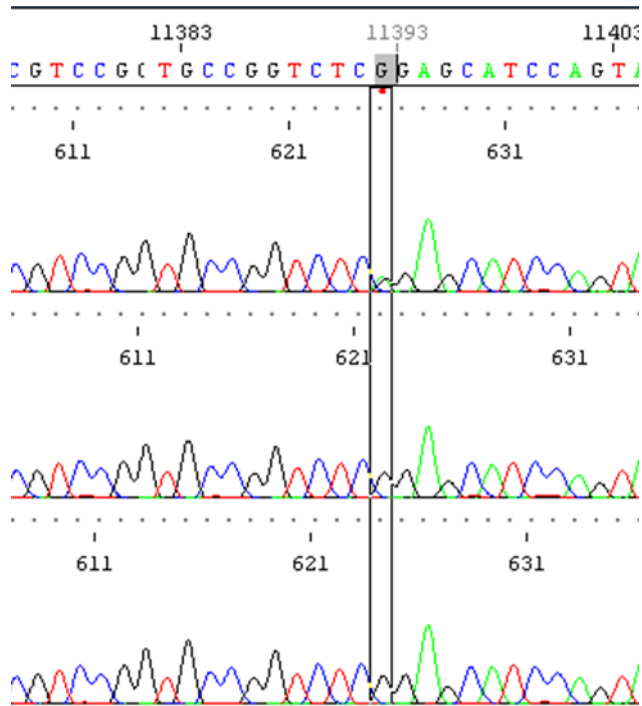

18. 5-3 control 2 I07, 61981303

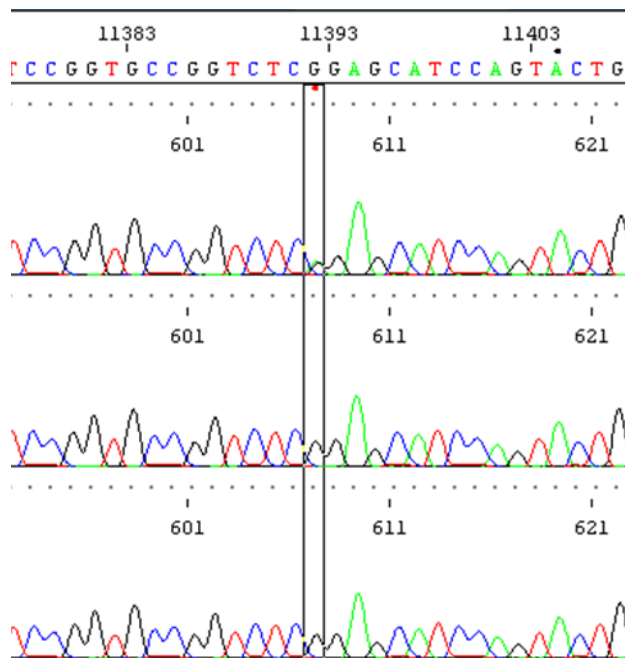

19. 5-3 control 2 I03, 61981603

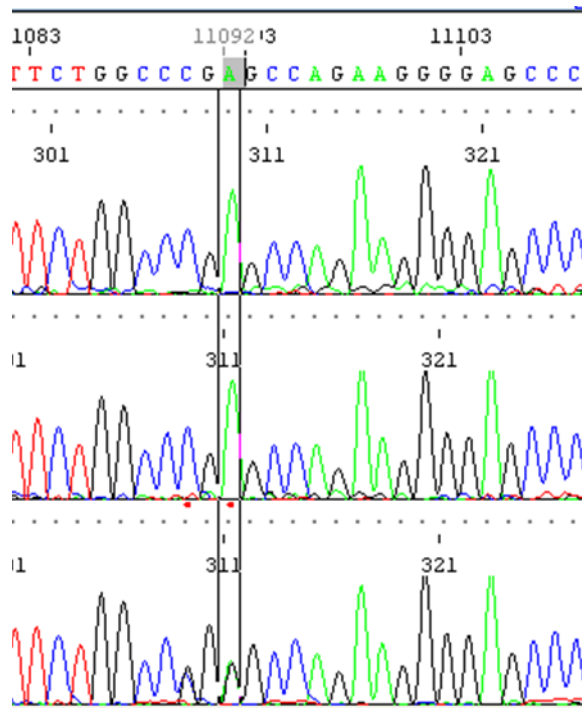

20. 5-3 control 2 I21, 61981322

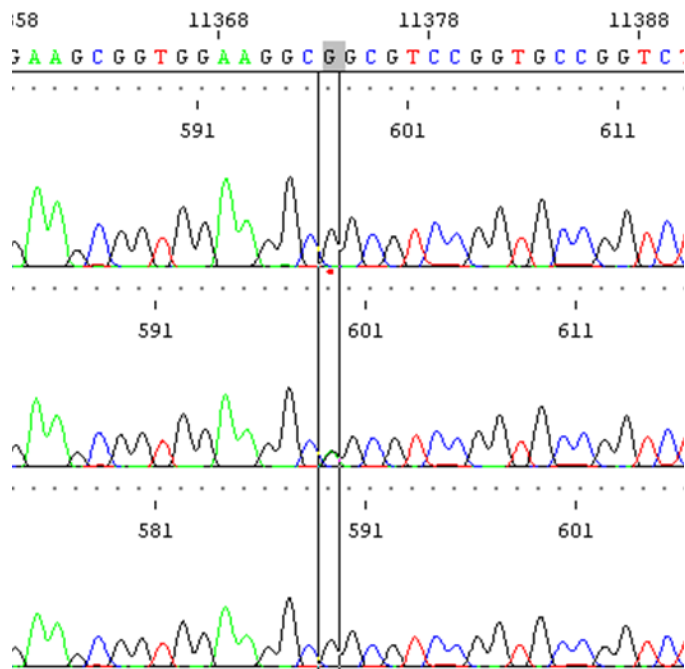

21. 5-3 control 2 K02, 61981603

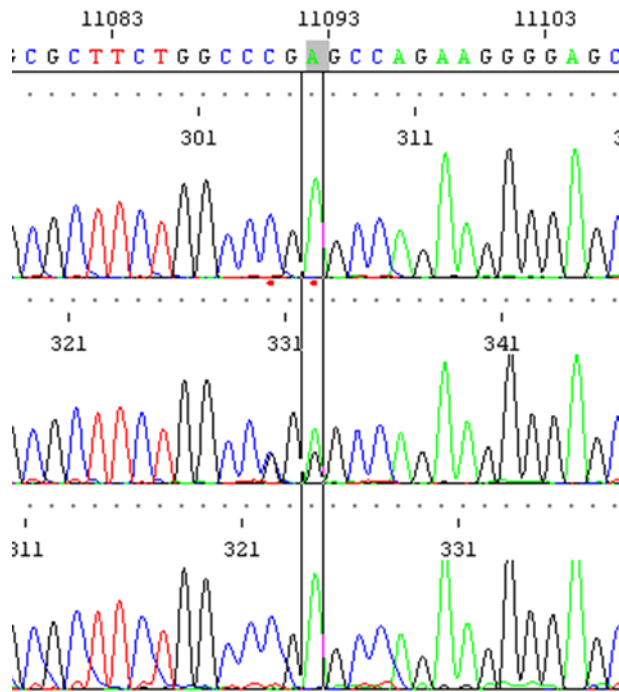

22. 5-3 control 2 L03, 61981411

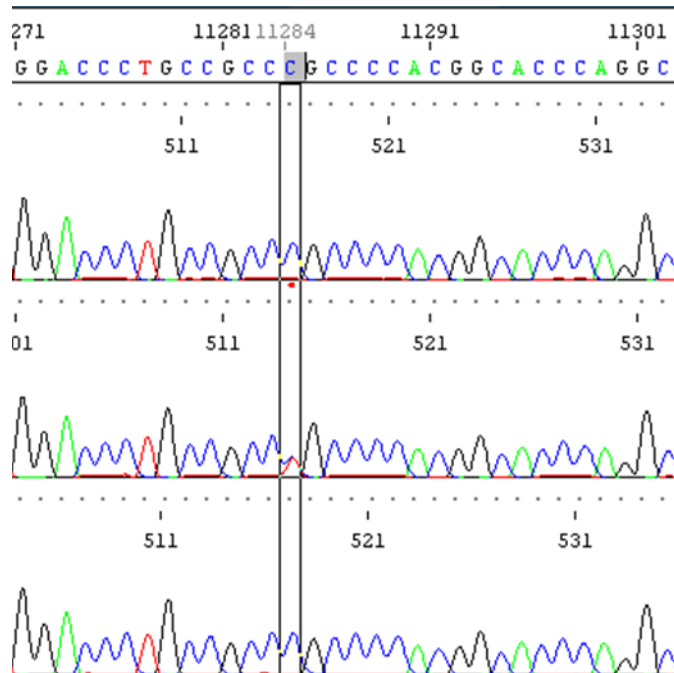

23. 5-3 control 2 L22, 61981411

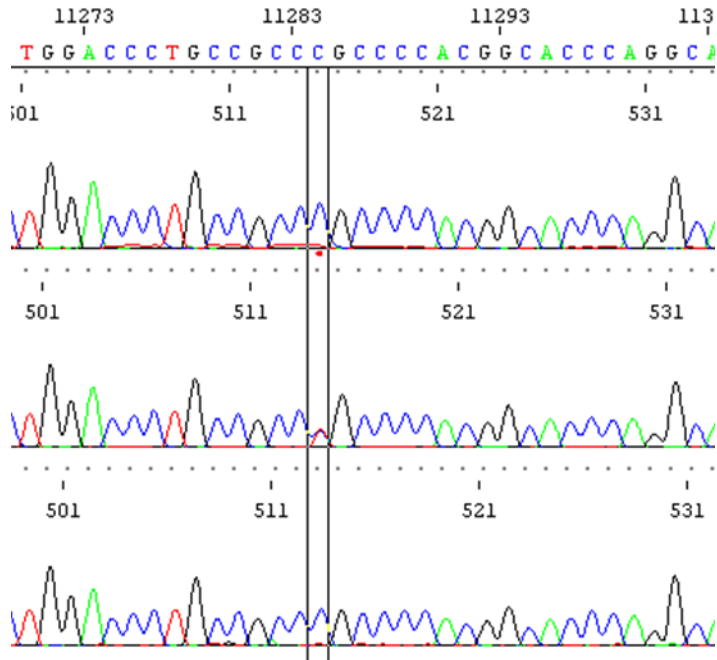

24. 5-3 control 2 M09, 61981762

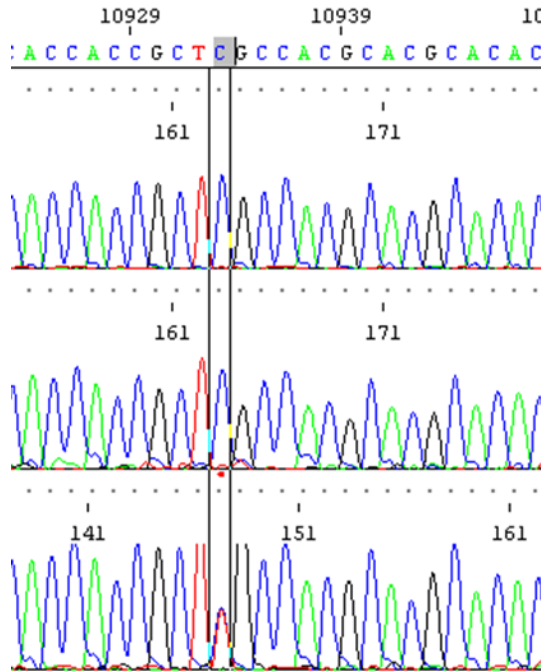



27. 5-4 control 1 G06, 61981052

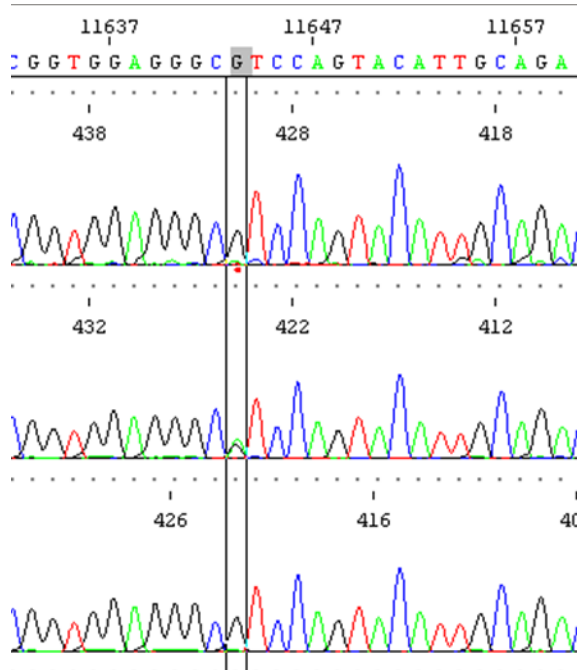

28. 5-4 control 1 J04, 61981052

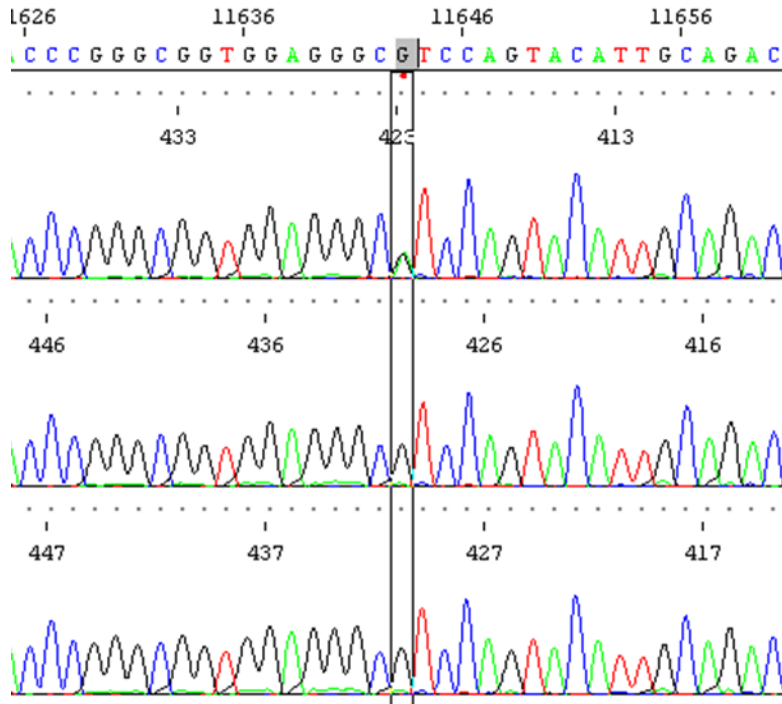

29. 5-4 control 1 P21, 61981138

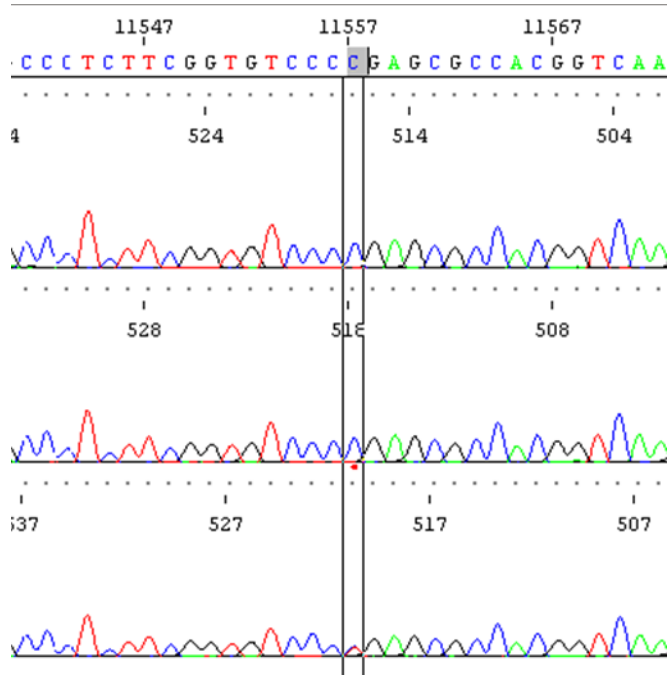

30. 5-4 control 3 G07, 61981102

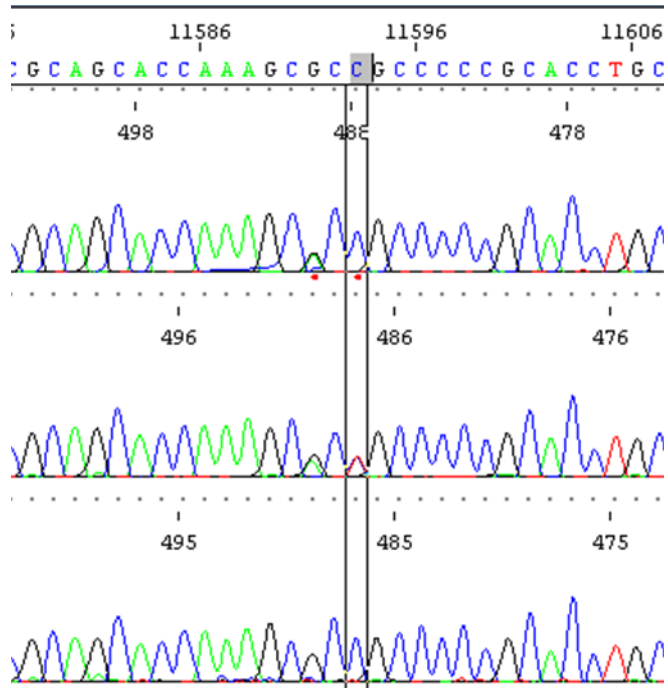





33. Discovery stage 5-3 control 2 E09, 61981411

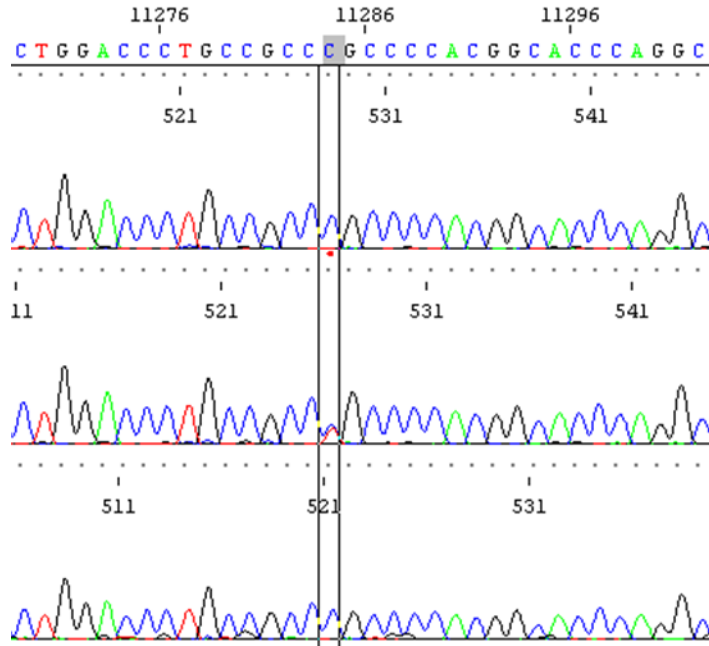

34. Discovery stage 5-3 control 2 B07, 61981709

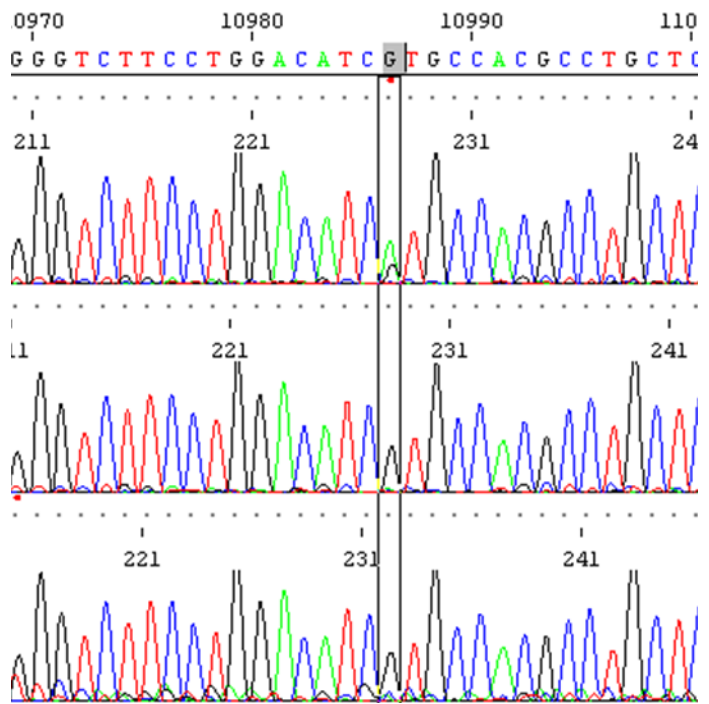

35. Discovery stage 5-3 control cleanup 3 H08, 61981322

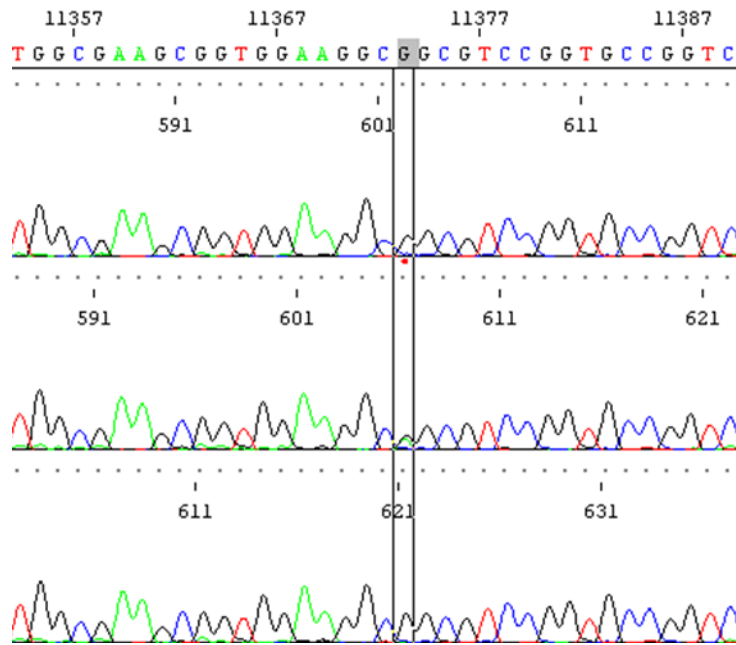

Cases (18 in total)

1. 5-3 cases 1 H06, 61981757

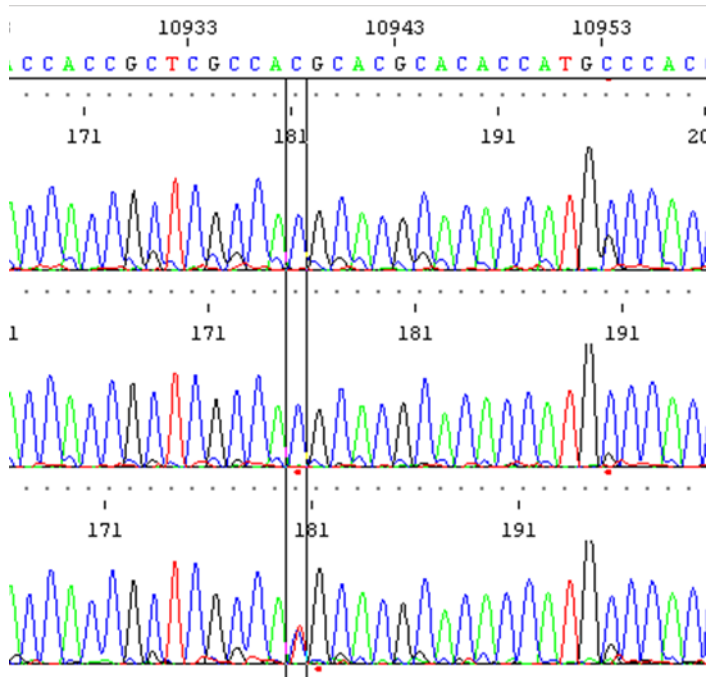

2. 5-3 cases 1 I17, 61981603

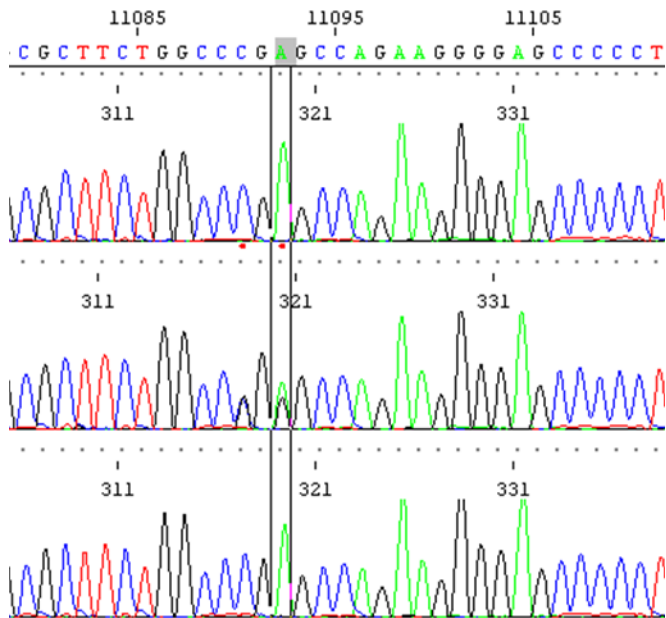

3. 5-3 cases 1 L24, 61981594

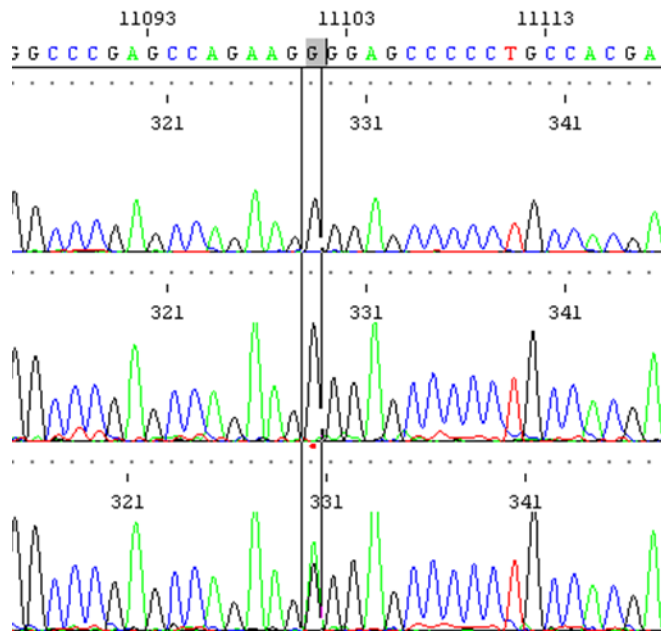

4. 5-3 cases 2 O10, 61981579

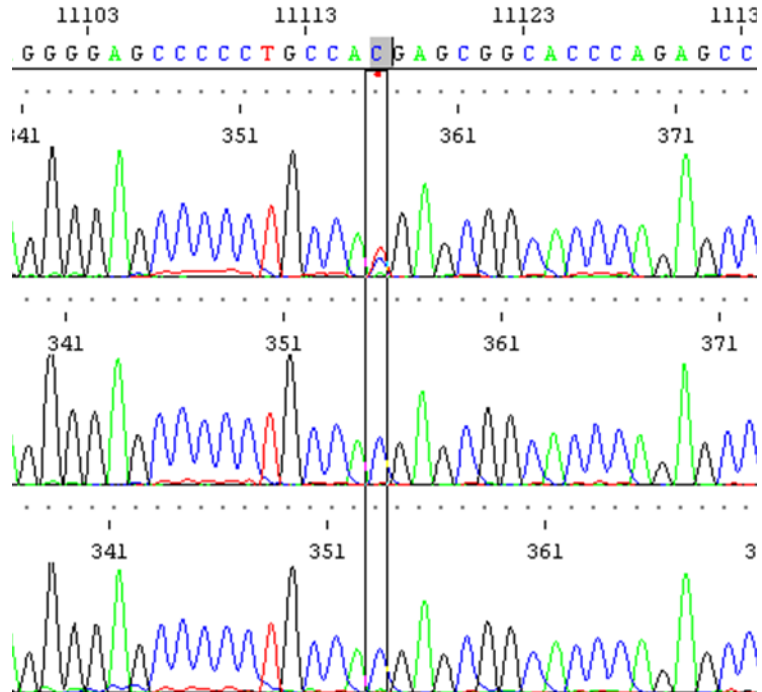

5. 5-3 cases 2 E15, 61981390

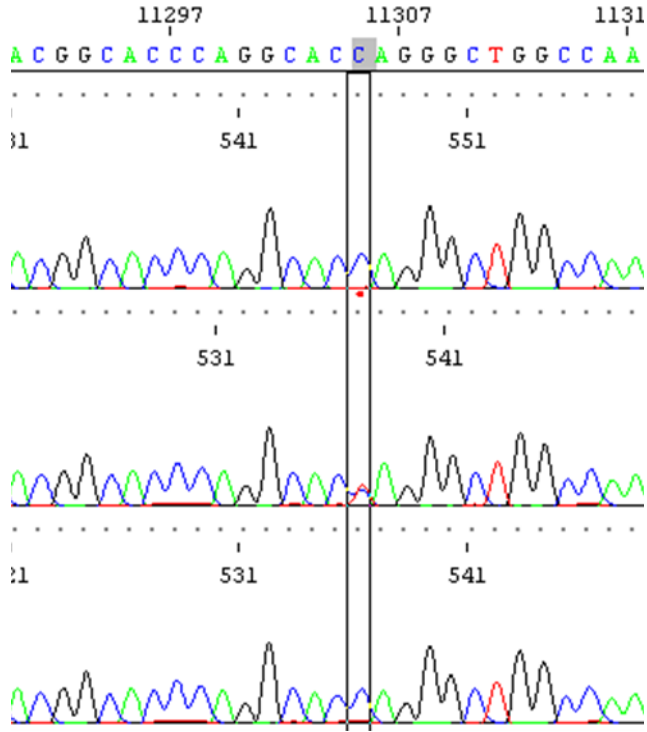

6. 5-3 cases 2 I21, 61981390

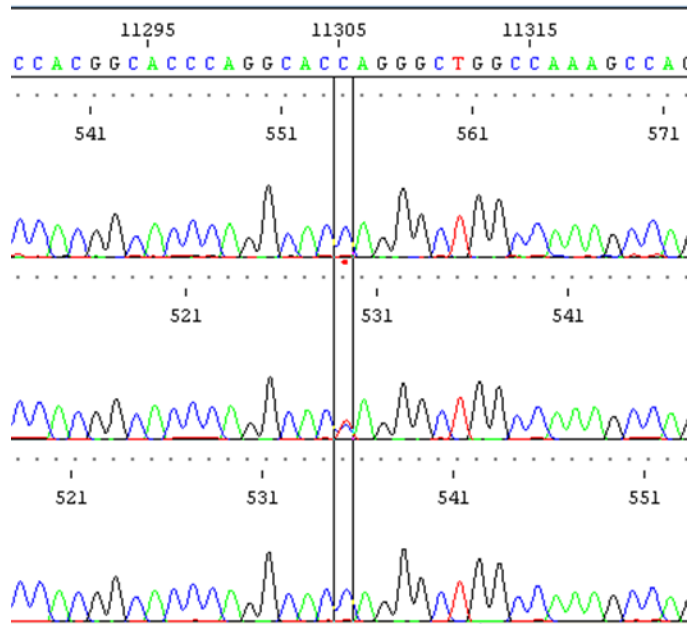

7. 5-3 cases 2 A22, 61981654

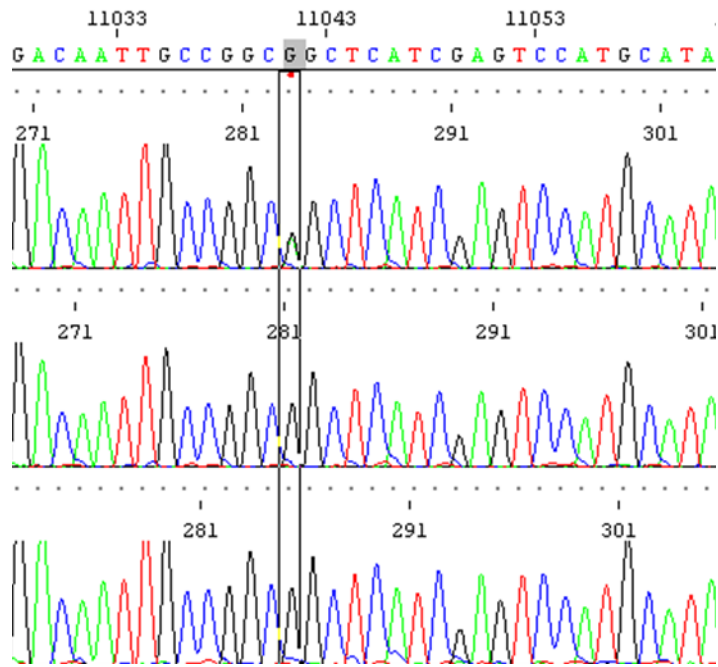

8. 5-3 cases 2 I08, 61981603

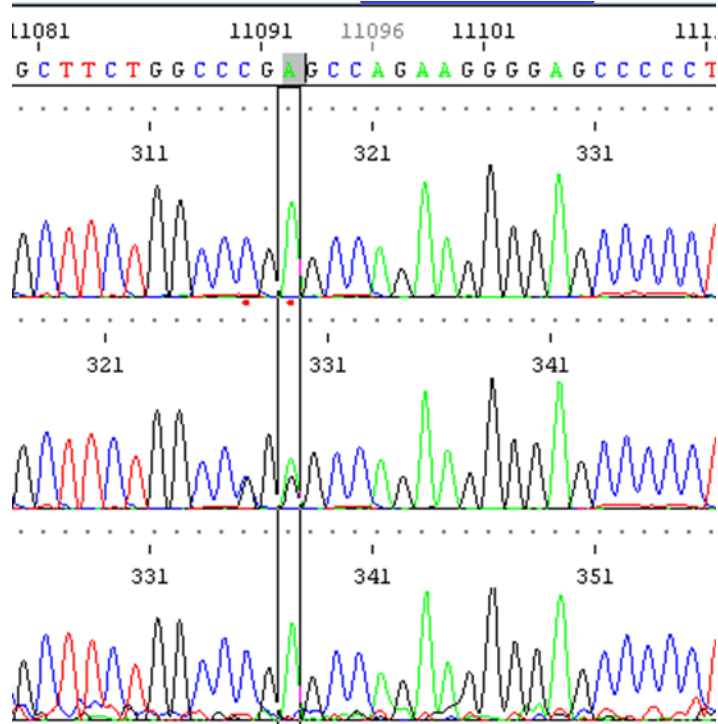

9. 5-3 cases 2 B18, 61981322

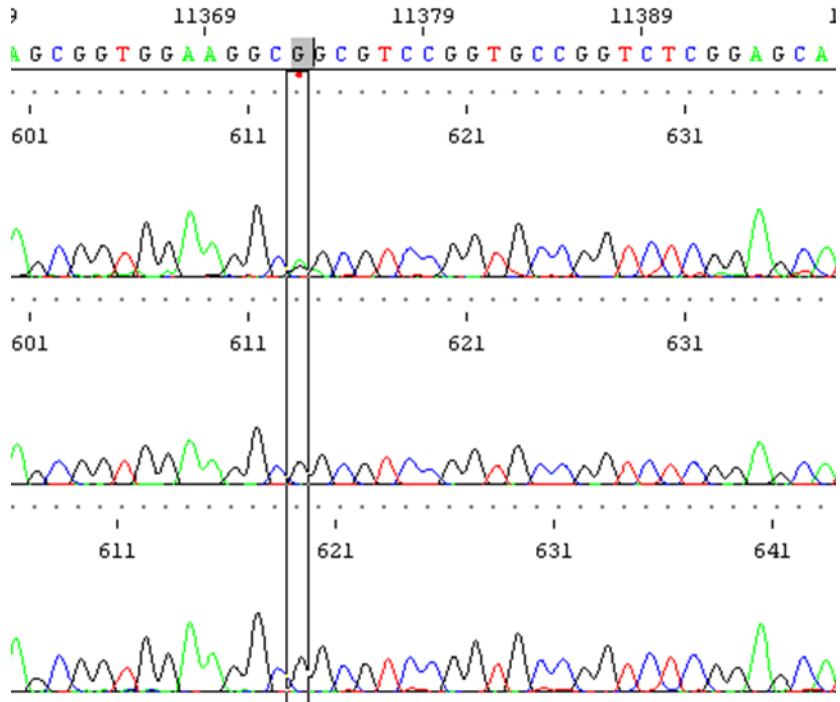

10. 5-3 cases 2 H22, 61981411

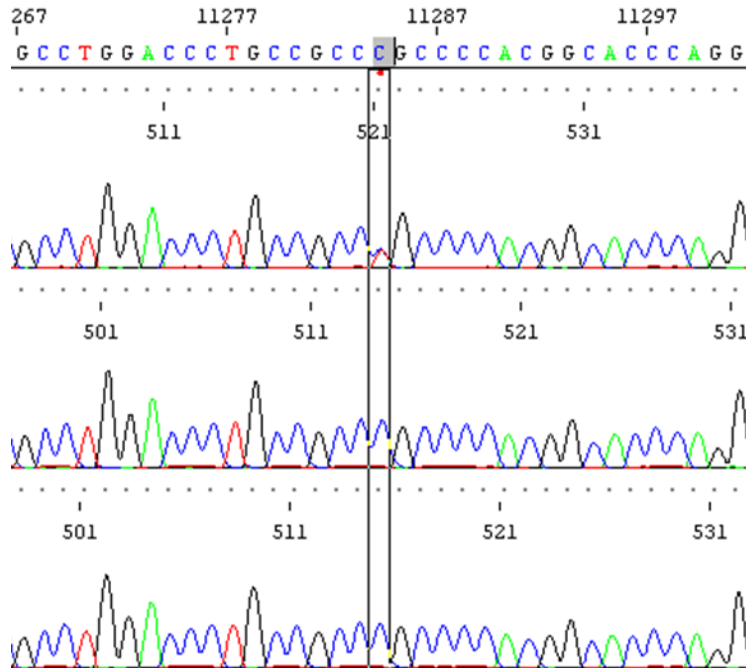



11. 5-3 cases 2 H18, 61981535

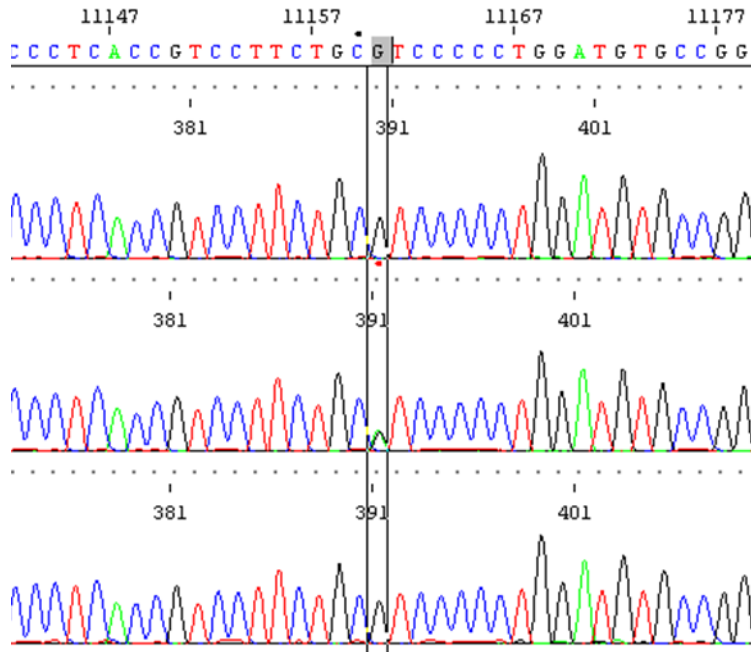

12. 5-3 cases 3 O14, 61981603

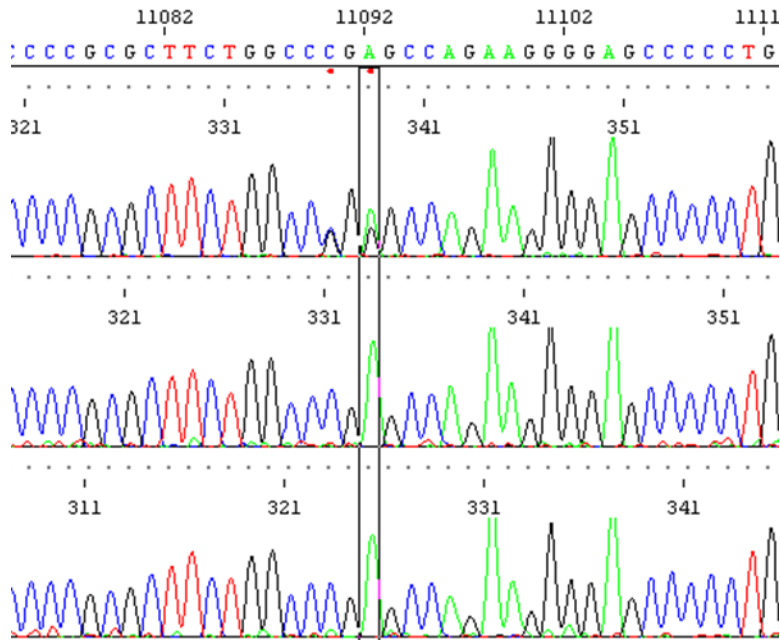

13. 5-3 cases 3 I20, 61981603

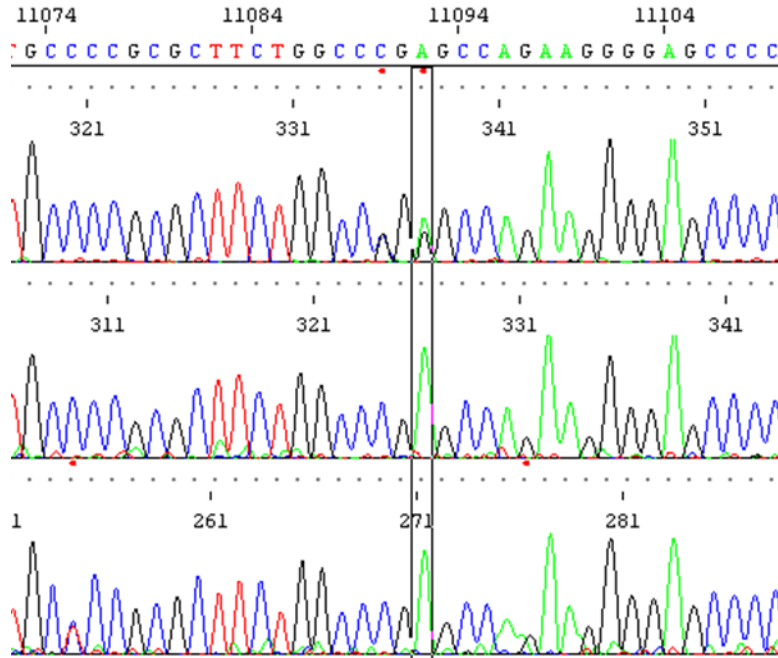

14. 5-3 cases 3 N07, 61981322

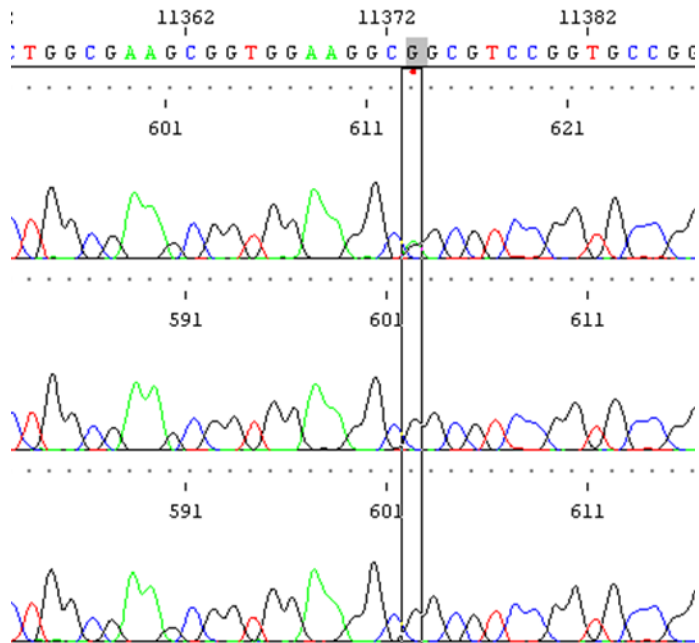

15. Discovery stage 5-3 cases 1 G06, 61981411

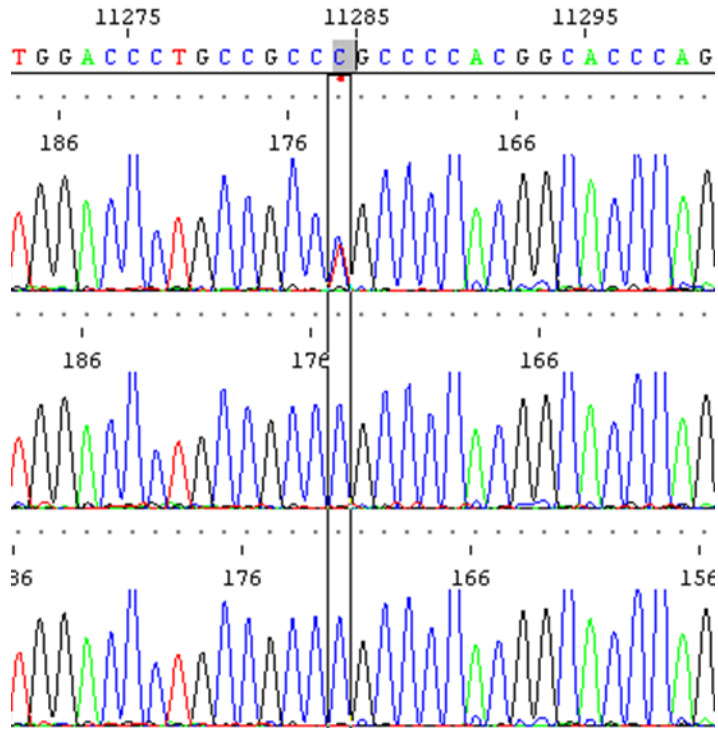

16. Discovery stage 5-3 cases 2 A02, 61981303

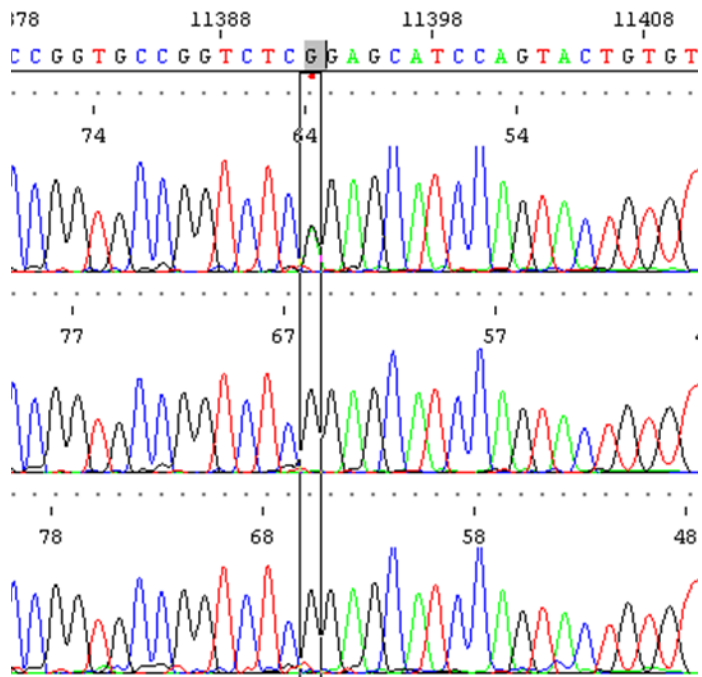

17. Discovery stage 5-4 cases 1 A06, 61981129

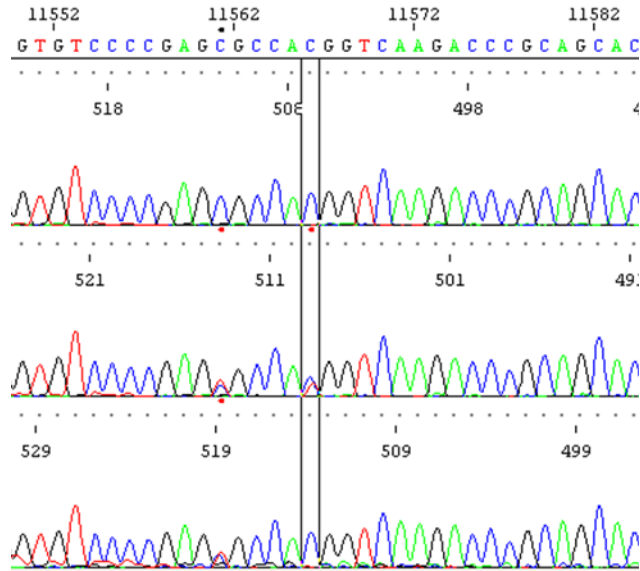

18. Discovery stage 5-4 cases 1 B06, 61981129

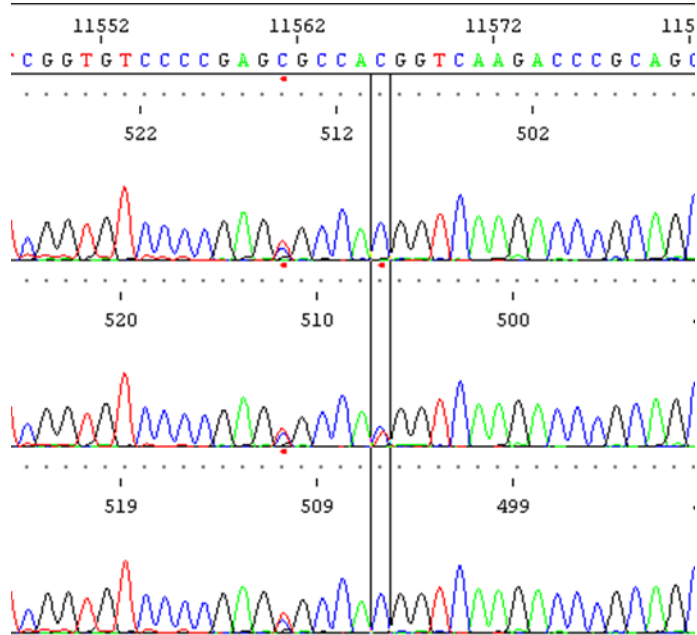

Supplement: NIHMS307419-supplement-01.pdf [file NIHMS307419-supplement-01.pdf]
